# Supplementary material
Source: publisher figshare collection journal article supplement (https://tandf.figshare.com/ndownloader/files/33660571)
Supplement: Supplementary file 1 [file 33660571]

source("SemiparametricTest_revision_final.R")
##plot the covariates
library(fields)

gausmod_cov <- RMgauss(var=1, scale=0.1)
default_rf <- sample_rf(seed = 100,n=2,gausmod=gausmod_cov)
default_rf_2 <- sample_rf(seed = 10,n=2,gausmod=gausmod_cov)

#plot the baseline intensity
pdf("./fig/Fig2-a.pdf")
par(mai=c(0.9,0.9,0.5,0.2))
set.seed(500)
gridx <- seq(0,2,l=100)
gridy <- seq(0,2,l=100)
image.plot(x=gridx,y=gridy,z=default_rf,main=expression(bold(paste("(a) The Spatial Covariate ",Z[1](s),sep=' '))),xlab="x",ylab="y",cex.lab=1.5,cex.main=1.5,cex.axis=1.3)
dev.off()

pdf("./fig/Fig2-b.pdf")
par(mai=c(0.9,0.9,0.5,0.2))
image.plot(x=gridx,y=gridy,z=default_rf_2,main=expression(bold(paste("(b) The Spatial Covariate ",Z[2](s),sep=' '))),xlab="x",ylab="y",cex.lab=1.5,cex.main=1.5,cex.axis=1.3)
dev.off()


ylim <- c(1,8)
ylab=expression(g[0](r))
xlab="r"
len1 <- expression(paste("Thomas,",kappa,"=50,",omega,"=0.04"))
len2 <- expression(paste("VarGamma,",kappa,"=50,",omega,"=0.04"))
len3 <- expression(paste("MatClust,",kappa,"=50,",omega,"=0.04"))
len4 <- expression(paste("Thomas,",kappa,"=100,",omega,"=0.02"))
len5 <- expression(paste("VarGamma,",kappa,"=100,",omega,"=0.02"))
len6 <- expression(paste("MatClust,",kappa,"=50,",omega,"=0.03"))
r <- seq(0,0.15,l=100)
main="(b) True PCFs (Shot-noise Process)"
pdf("./fig/Fig2-b.pdf")
par(mai=c(0.9,1,0.5,0.2),mfrow=c(1,1))
plot(r,gfun_Thomas(r,50,0.04),lwd=2,ylim=ylim,xlab=xlab,ylab=ylab,main=main,cex.lab=1.5,cex.main=1.5,cex.axis=1.3,type="l")
lines(r,gfun_Thomas(r,100,0.02),type="l",lwd=2,ylim=c(1,3.5),col=1,lty=2)
lines(r,gfun_Vargamma(r,50,0.04),type="l",lwd=2,ylim=c(1,3.5),col=2,lty=1)
lines(r,gfun_Vargamma(r,100,0.02),type="l",lwd=2,ylim=c(1,3.5),col=2,lty=2)
lines(r,gfun_Mtclust(r,50,0.04),type="l",lwd=2,ylim=c(1,3.5),col=4,lty=1)
lines(r,gfun_Mtclust(r,50,0.03),type="l",lwd=2,ylim=c(1,3.5),col=4,lty=2)
legend(0.05,8, legend=c(len1,len2,len3),col=c(1,2,4),lty=c(1,1,1),lwd=2,bty = "n")
legend(0.05,6.5, legend=c(len4,len5,len6),col=c(1,2,4),lty=c(2,2,2),lwd=2,bty = "n")
dev.off()

main="(c) True PCFs (LGCP)"
len1 <- expression(paste("LGCP-G, ",sigma^2,"=0.7, ",phi,"=0.09"))
len2 <- expression(paste("LGCP-E, ",sigma^2,"=1.1, ",phi,"=0.05"))
len3 <- expression(paste("LGCP-C, ",sigma^2,"=1.6, ",phi,"=0.10"))
len4 <- expression(paste("LGCP-G, ",sigma^2,"=1.1, ",phi,"=0.05"))
len5 <- expression(paste("LGCP-E, ",sigma^2,"=1.6, ",phi,"=0.03"))
len6 <- expression(paste("LGCP-C, ",sigma^2,"=2.1, ",phi,"=0.07"))
pdf("./fig/Fig2-c.pdf")
par(mai=c(0.9,1,0.5,0.2),mfrow=c(1,1))
gausmod <- RMgauss(var=0.7, scale=0.09)
plot(r, gfun_LGCP(r,gausmod),lwd=2,ylim=ylim,xlab=xlab,ylab=ylab,main=main,cex.lab=1.5,cex.main=1.5,cex.axis=1.3,type="l")
gausmod <- RMgauss(var=1.1, scale=0.05)
lines(r,gfun_LGCP(r,gausmod),type="l",lwd=2,ylim=c(1,3.5),col=1,lty=2)
gausmod <- RMexp(var=1.1, scale=0.05)
lines(r,gfun_LGCP(r,gausmod),type="l",lwd=2,ylim=c(1,3.5),col=2,lty=1)
gausmod <- RMexp(var=1.6, scale=0.03)
lines(r,gfun_LGCP(r,gausmod),type="l",lwd=2,ylim=c(1,3.5),col=2,lty=2)
gausmod <- RMcircular(var=1.6, scale=0.1)
lines(r,gfun_LGCP(r,gausmod),type="l",lwd=2,ylim=c(1,3.5),col=4,lty=1)
gausmod <- RMcircular(var=2.1, scale=0.07)
lines(r,gfun_LGCP(r,gausmod),type="l",lwd=2,ylim=c(1,3.5),col=4,lty=2)
legend(0.05,8, legend=c(len1,len2,len3),col=c(1,2,4),lty=c(1,1,1),lwd=2,bty = "n")
legend(0.05,6.5, legend=c(len4,len5,len6),col=c(1,2,4),lty=c(2,2,2),lwd=2,bty = "n")
dev.off()
